# Supplementary material
Source: publisher site journal article supplement (https://www.dovepress.com/article/478072)
Supplement: Supplementary file 1 [file get_supplementary_file.php]

Supplementary Material

Supplementary table 1

Information related to the 123 differential metabolites

| No | Compounds | Formula | Q1 (Da) | Molecular weight (Da) | RT (min) | Adduct |
| --- | --- | --- | --- | --- | --- | --- |
| 1 | LPC(20:2/0:0) | C28H54NO7P | 5.95E+02 | 5.47E+02 | 9.37E+00 | M+HCOO+2H |
| 2 | LPC(0:0/20:5) | C28H49NO7P | 5.42E+02 | 5.42E+02 | 7.73E+00 | M+ |
| 3 | Lys-Arg-Leu-Glu | C23H44N8O7 | 5.45E+02 | 5.44E+02 | 8.98E+00 | M+H |
| 4 | Ile-Ser-Asp-Arg-Ile | C25H46N8O9 | 6.03E+02 | 6.02E+02 | 9.24E+00 | M+H |
| 5 | Arg-Val-Ile-Trp-Gly | C30H47N9O6 | 6.30E+02 | 6.29E+02 | 9.12E+00 | M+H |
| 6 | (2S)-1-[(2S,4R)-4-benzyl-2-hydroxy-5-[[(1R,2R)-2-hydroxy-2,3-dihydro-1H-inden-1-yl]amino]-5-oxopentyl]-N-tert-butyl-4-(pyridin-3-ylmethyl)piperazine-2-carboxamide | C36H47N5O4 | 5.96E+02 | 6.13E+02 | 8.89E+00 | M+H-H2O |
| 7 | Abu-Nap-OH | C22H20N2O6 | 4.09E+02 | 4.08E+02 | 4.07E+00 | M+H |
| 8 | Phe-Asn-Ile-Glu | C24H35N5O8 | 5.22E+02 | 5.21E+02 | 8.24E+00 | M+H |
| 9 | Met-Leu-Arg-Ala-Ala | C23H44N8O6S | 5.61E+02 | 5.60E+02 | 8.97E+00 | M+H |
| 10 | Lys-Thr-Phe-Glu | C24H37N5O8 | 5.24E+02 | 5.23E+02 | 8.92E+00 | M+H |
| 11 | Lys-Ala-Arg-Glu | C20H38N8O7 | 5.03E+02 | 5.02E+02 | 8.92E+00 | M+H |
| 12 | Phe-Val-His-Arg | C26H39N9O5 | 5.58E+02 | 5.57E+02 | 8.98E+00 | M+H |
| 13 | Isopropyl dodecylfluorophosphonate | C15H32FO2P | 5.89E+02 | 2.94E+02 | 1.13E+01 | 2M+H |
| 14 | Thr-Glu-Leu-Lys | C21H39N5O8 | 4.90E+02 | 4.89E+02 | 9.18E+00 | M+H |
| 15 | Gln-Val-Ile-Asp | C20H35N5O8 | 4.74E+02 | 4.73E+02 | 7.89E+00 | M+H |
| 16 | METHYL 3,12-DIHYDROXY-11-KETOISOALLOSPIROSTAN-3-HEMISUCCINATE | C32H48O8 | 5.61E+02 | 5.60E+02 | 9.82E+00 | M+H |
| 17 | Lys-Asn-Ser-Asp | C17H30N6O9 | 4.63E+02 | 4.62E+02 | 8.97E+00 | M+H |
| 18 | Tribenzylamine N-oxide | C21H21NO | 3.04E+02 | 3.03E+02 | 2.34E+00 | M+H |
| 19 | palmyramide A | C36H53N3O9 | 6.72E+02 | 6.71E+02 | 9.33E+00 | M+H |
| 20 | Asp-Met-Leu-Asp-Leu | C25H43N5O10S | 6.06E+02 | 6.05E+02 | 8.92E+00 | M+H |
| 21 | Ser-Lys-Phe-Leu-Lys | C30H51N7O7 | 6.22E+02 | 6.21E+02 | 9.47E+00 | M+H |
| 22 | Prolyltryptophan | C16H19N3O3 | 3.02E+02 | 3.01E+02 | 2.28E+00 | M+H |
| 23 | Asp-Thr-Val-Ile-Glu | C24H41N5O11 | 5.76E+02 | 5.75E+02 | 8.47E+00 | M+H |
| 24 | Ile-Glu-Leu-Lys | C23H43N5O7 | 5.02E+02 | 5.01E+02 | 9.04E+00 | M+H |
| 25 | Ala-Lys-Ser | C12H24N4O5 | 6.26E+02 | 3.04E+02 | 3.04E+00 | 2M+NH4 |
| 26 | 7-[3-(Dimethylamino)propoxy]-6-Methoxy-2-(4-Methyl-1,4-Diazepan-1-Yl)-N-(1-Methylpiperidin-4-Yl)quinazolin-4-Amine | C26H43N7O2 | 5.08E+02 | 4.85E+02 | 8.45E+00 | M+Na |
| 27 | 1-Oleoyl-2-myristoyl-sn-glycero-3-phosphocholine | C40H78NO8P | 7.33E+02 | 7.32E+02 | 1.00E+01 | M+H |
| 28 | N-dodecanoyl-L-Homoserine lactone-3-hydrazone-biotin | C26H43N5O5S | 5.38E+02 | 5.37E+02 | 9.21E+00 | M+H |
| 29 | Mandelonitrile | C8H7NO | 1.75E+02 | 1.33E+02 | 2.45E+00 | M+CH3CN+H |
| 30 | PE-NMe2(18:3(9Z,12Z,15Z)/18:3(9Z,12Z,15Z)) | C43H74NO8P | 7.82E+02 | 7.64E+02 | 8.88E+00 | M+NH4 |
| 31 | (1E,2S)-2-methylbutanal oxime | C5H11NO | 1.46E+02 | 1.01E+02 | 2.45E+00 | M-H+2Na |
| 32 | LPE(0:0/18:2) | C23H44NO7P | 5.00E+02 | 4.77E+02 | 7.77E+00 | M+Na |
| 33 | 1-Stearidonoyl-3-stearidonoyl-sn-glycerol | C39H60O5 | 6.09E+02 | 6.08E+02 | 9.82E+00 | M+H |
| 34 | 7-Methoxypradimicinone II | C29H25NO12 | 5.80E+02 | 5.79E+02 | 1.74E+00 | M+H |
| 35 | Isofenphos-methyl | C14H22NO4PS | 3.30E+02 | 3.31E+02 | 9.30E-01 | M-H |
| 36 | Garcinone C | C23H26O7 | 4.51E+02 | 4.14E+02 | 5.67E-01 | M+K-2H |
| 37 | 4-Oxo-4-(pyridin-3-yl)butanal | C9H9NO2 | 1.44E+02 | 1.63E+02 | 2.39E+00 | M-H2O-H |
| 38 | L-Histidine | C6H9N3O2 | 1.54E+02 | 1.55E+02 | 6.13E-01 | M-H |
| 39 | Pergolide | C19H26N2S | 3.13E+02 | 3.14E+02 | 6.10E+00 | M-H |
| 40 | Phenylalanine | C9H11NO2 | 1.46E+02 | 1.65E+02 | 1.86E+00 | M-H2O-H |
| 41 | 2-Hydroxybutyric acid | C4H8O3 | 1.03E+02 | 1.04E+02 | 1.39E+00 | M-H |
| 42 | Unii-WN080Z1OL0 | C36H38O8 | 5.97E+02 | 5.98E+02 | 5.59E+00 | M-H |
| 43 | Asp-Asp | C8H12N2O7 | 3.96E+02 | 2.48E+02 | 9.75E-01 | M-H+CH3CN |
| 44 | L-Lysine | C6H14N2O2 | 1.45E+02 | 1.46E+02 | 5.82E-01 | M-H |
| 45 | 5-Hydroxytryptophan | C11H12N2O3 | 2.19E+02 | 2.20E+02 | 2.39E+00 | M-H |
| 46 | Buprenorphine | C29H41NO4 | 4.66E+02 | 4.67E+02 | 9.32E+00 | M-H |
| 47 | Arbutin | C12H16O7 | 2.88E+02 | 2.72E+02 | 1.97E+00 | M+NH4-2H |
| 48 | Indoxyl sulfate | C8H7NO4S | 2.12E+02 | 2.13E+02 | 3.65E+00 | M-H |
| 49 | Vandetanib | C22H24BrFN4O2 | 4.90E+02 | 4.76E+02 | 3.06E+00 | M+NH4-2H |
| 50 | 3'-Sialyllactose | C23H39NO19 | 6.32E+02 | 6.33E+02 | 6.05E+00 | M-H |
| 51 | Isocitric acid | C6H8O7 | 2.27E+02 | 1.92E+02 | 1.05E+00 | M+Cl |
| 52 | S-Methylglutathione | C11H19N3O6S | 3.20E+02 | 3.21E+02 | 1.14E+00 | M-H |
| 53 | Indoleacetaldehyde | C10H9NO | 1.58E+02 | 1.59E+02 | 2.39E+00 | M-H |
| 54 | 13,14-dihydro-15-keto-tetranor Prostaglandin F1beta | C16H28O5 | 2.99E+02 | 3.00E+02 | 4.95E+00 | M-H |
| 55 | 4'-Hydroxyacetophenone 4'-[4-hydroxybenzoyl-(->5)-apiosyl-(1->2)-glucoside] | C26H30O13 | 5.50E+02 | 5.50E+02 | 1.30E+00 | M- |
| 56 | ONO-8711 | C22H30ClNO4S | 4.20E+02 | 4.39E+02 | 2.13E+00 | M-H2O-H |
| 57 | Gymnodimine | C32H45NO4 | 5.06E+02 | 5.07E+02 | 9.11E+00 | M-H |
| 58 | L-Alanyl-L-tryptophan | C14H17N3O3 | 2.74E+02 | 2.75E+02 | 2.92E+00 | M-H |
| 59 | N-Isovaleroylglycine | C7H13NO3 | 1.58E+02 | 1.59E+02 | 2.81E+00 | M-H |
| 60 | Hydroxyvalerenic Acid | C15H22O3 | 2.87E+02 | 2.50E+02 | 5.51E-01 | M+K-2H |
| 61 | Isobutyrylglycine | C6H11NO3 | 1.44E+02 | 1.45E+02 | 2.02E+00 | M-H |
| 62 | Desthiobiotin | C10H18N2O3 | 2.13E+02 | 2.14E+02 | 4.85E+00 | M-H |
| 63 | Hydroxyisocaproic acid | C6H12O3 | 1.31E+02 | 1.32E+02 | 3.43E+00 | M-H |
| 64 | Clofarabine | C10H11ClFN5O3 | 2.84E+02 | 3.03E+02 | 1.86E+00 | M-H2O-H |
| 65 | Bisindolylmaleimide v | C21H15N3O2 | 3.86E+02 | 3.41E+02 | 2.01E+00 | M+HCOO |
| 66 | Cytochalasin Opho | C28H37NO4 | 4.50E+02 | 4.51E+02 | 8.00E+00 | M-H |
| 67 | LPE(0:0/20:5) | C25H42NO7P | 4.98E+02 | 4.99E+02 | 7.89E+00 | M-H |
| 68 | Triptolide analog | C21H30O5 | 3.61E+02 | 3.62E+02 | 5.49E+00 | M-H |
| 69 | Phe-Tyr-Asn-Glu | C27H33N5O9 | 5.70E+02 | 5.71E+02 | 5.61E+00 | M-H |
| 70 | Asp-Tyr-Glu-Lys | C24H35N5O10 | 6.12E+02 | 5.53E+02 | 6.17E+00 | M+CH3COO |
| 71 | Quinaldic acid | C10H7NO2 | 1.72E+02 | 1.73E+02 | 2.39E+00 | M-H |
| 72 | Ile-Phe-Gln-Glu | C25H37N5O8 | 5.94E+02 | 5.35E+02 | 5.61E+00 | M+CH3COO |
| 73 | Gln-Lys-Phe-Arg | C26H43N9O6 | 5.76E+02 | 5.77E+02 | 7.98E+00 | M-H |
| 74 | Phe-Asp-Arg-Asp | C23H33N7O9 | 6.10E+02 | 5.51E+02 | 5.61E+00 | M+CH3COO |
| 75 | Val-Gln-Phe-Asp | C23H33N5O8 | 5.06E+02 | 5.07E+02 | 3.85E+00 | M-H |
| 76 | Trifolirhizin | C22H22O10 | 4.81E+02 | 4.46E+02 | 1.17E+00 | M+Cl |
| 77 | D-ribofuranose 5-phosphate | C5H11O8P | 2.11E+02 | 2.30E+02 | 1.07E+00 | M-H2O-H |
| 78 | LysoPA(22:0/0:0) | C25H51O7P | 5.10E+02 | 4.94E+02 | 9.98E+00 | M+NH4-2H |
| 79 | beta-Doradecin | C40H52O3 | 5.79E+02 | 5.80E+02 | 8.69E+00 | M-H |
| 80 | 1-(4-hydroxy-3-methoxyphenyl)-3-(5-methoxy-2,2-dimethyl-2H-chromen-6-yl)prop-2-en-1-one | C22H22O5 | 3.65E+02 | 3.66E+02 | 1.60E+00 | M-H |
| 81 | Farnesyl phosphate | C15H27O4P | 3.02E+02 | 3.02E+02 | 2.30E+00 | M- |
| 82 | (4-Amino-2-methylpyrimidin-5-YL)methyl dihydrogen phosphate | C6H10N3O4P | 2.56E+02 | 2.19E+02 | 2.49E+00 | M+K-2H |
| 83 | 6,8a-Seco-6,8a-deoxy-5-oxoavermectin''1b'' aglycone | C33H46O7 | 5.53E+02 | 5.54E+02 | 7.86E+00 | M-H |
| 84 | 1-Octadecanoyl-cyclophosphatidic acid | C21H41O6P | 4.19E+02 | 4.20E+02 | 9.98E+00 | M-H |
| 85 | 2-Stearoylglycerophosphoinositol | C27H53O12P | 5.99E+02 | 6.00E+02 | 1.24E+01 | M-H |
| 86 | Trihydroxyferuloyl spermidine | C37H43N3O12 | 7.20E+02 | 7.21E+02 | 9.11E+00 | M-H |
| 87 | Enniatin B | C33H57N3O9 | 6.62E+02 | 6.39E+02 | 3.60E+00 | M+Na |
| 88 | LPE(18:2/0:0) | C23H44NO7P | 4.78E+02 | 4.77E+02 | 8.24E+00 | M+H |
| 89 | Debromohymenialdisine | C11H11N5O2 | 4.91E+02 | 2.45E+02 | 5.31E+00 | 2M+H |
| 90 | 1-O-Octadecyl-SN-glycero-3-phosphocholine | C26H56NO6P | 5.94E+02 | 5.09E+02 | 9.12E+00 | M+K+HCOOH |
| 91 | 1-Octadecyl-2-acetyl-sn-glycero-3-phosphocholine | C28H58NO7P | 6.20E+02 | 5.51E+02 | 9.58E+00 | M+Na+HCOOH |
| 92 | 1-O-(4-Coumaroyl)-beta-D-glucose | C15H18O8 | 3.49E+02 | 3.26E+02 | 2.27E+00 | M+Na |
| 93 | 1-Hexadecanoyl-2-octadecanoyl-sn-glycero-3-phosphocholine | C42H84NO8P | 7.85E+02 | 7.62E+02 | 6.19E+00 | M+Na |
| 94 | 9-OXO-11alpha,15S-DIHYDROXY-PROSTA-5Z,13E-DIEN-1-OIC ACID, (4-ACETYLAMINO) PHENYL ESTER | C28H39NO6 | 4.68E+02 | 4.85E+02 | 8.62E+00 | M+H-H2O |
| 95 | 1-Acetylindole | C10H9NO | 1.60E+02 | 1.59E+02 | 2.46E+00 | M+H |
| 96 | Glutamine | C5H10N2O3 | 1.47E+02 | 1.46E+02 | 7.57E-01 | M+H |
| 97 | 1-O-Hexadecyl-sn-glycero-3-phosphocholine | C24H52NO6P | 4.82E+02 | 4.81E+02 | 8.97E+00 | M+H |
| 98 | Dehydroemetine | C29H38N2O4 | 4.79E+02 | 4.78E+02 | 8.24E+00 | M+H |
| 99 | (1S,2R,6S,7R,9R,11S,12S,14S,15R,16S)-15-[(1R)-1-[(2R,4S)-4,5-dimethyl-6-oxooxan-2-yl]-1-hydroxyethyl]-6,14-dihydroxy-2,16-dimethyl-8-oxapentacyclo[9.7.0.02,7.07,9.012,16]octadec-4-en-3-one | C28H40O7 | 5.30E+02 | 4.88E+02 | 8.45E+00 | M+CH3CN+H |
| 100 | Cucurbitacin D | C30H44O7 | 4.99E+02 | 5.16E+02 | 7.28E+00 | M+H-H2O |
| 101 | N-(indole-3-acetyl)-L-leucine | C16H20N2O3 | 3.33E+02 | 2.88E+02 | 4.07E+00 | M-H+2Na |
| 102 | LPC(18:1/0:0) | C26H53NO7P | 5.22E+02 | 5.22E+02 | 8.98E+00 | M+ |
| 103 | L-Kynurenine | C10H12N2O3 | 2.09E+02 | 2.08E+02 | 1.97E+00 | M+H |
| 104 | 4-Hydroxy-l-tryptophan | C11H12N2O3 | 2.21E+02 | 2.20E+02 | 2.45E+00 | M+H |
| 105 | LPC(18:2/0:0) | C26H50NO7P | 5.20E+02 | 5.19E+02 | 8.30E+00 | M+H |
| 106 | 1-Aminocyclopropanecarboxylic acid | C4H7NO2 | 8.40E+01 | 1.01E+02 | 7.57E-01 | M+H-H2O |
| 107 | LPC(14:0/0:0) | C22H46NO7P | 4.68E+02 | 4.67E+02 | 7.62E+00 | M+H |
| 108 | 1-(9Z-octadecenoyl)-sn-glycero-3-phosphocholine | C26H52NO7P | 5.60E+02 | 5.21E+02 | 8.97E+00 | M+K |
| 109 | D-piperidine acid | C6H11NO2 | 1.30E+02 | 1.29E+02 | 6.20E-01 | M+H |
| 110 | Cyclothialidine | C26H35N5O12S | 6.24E+02 | 6.41E+02 | 8.92E+00 | M+H-H2O |
| 111 | Repaglinide | C27H36N2O4 | 4.53E+02 | 4.52E+02 | 7.89E+00 | M+H |
| 112 | Pov-pc | C29H56NO9P | 5.94E+02 | 5.93E+02 | 9.37E+00 | M+H |
| 113 | LPC(20:3/0:0) | C28H52NO7P | 6.10E+02 | 5.45E+02 | 8.94E+00 | M+CH3CN+Na |
| 114 | Becatecarin | C33H34Cl2N4O7 | 6.69E+02 | 6.68E+02 | 2.18E+00 | M+H |
| 115 | Guanosine | C10H13N5O5 | 2.84E+02 | 2.83E+02 | 1.47E+00 | M+H |
| 116 | Enantio-PAF C-16 | C26H54NO7P | 5.24E+02 | 5.23E+02 | 9.82E+00 | M+H |
| 117 | 1-Hexylamine | C6H15N | 1.02E+02 | 1.01E+02 | 1.22E+01 | M+H |
| 118 | all-trans-Carophyll yellow | C32H44O2 | 4.61E+02 | 4.60E+02 | 8.30E+00 | M+H |
| 119 | 1-Eicosanoyl-sn-glycero-3-phosphocholine | C28H58NO7P | 5.52E+02 | 5.51E+02 | 1.04E+01 | M+H |
| 120 | 3'-O-Methyladenosine | C11H15N5O4 | 3.28E+02 | 2.81E+02 | 2.14E+00 | M+HCOO+2H |
| 121 | Glycerophospho-N-Palmitoyl Ethanolamine | C21H44NO7P | 4.54E+02 | 4.53E+02 | 7.89E+00 | M+H |
| 122 | LPE(16:1/0:0) | C21H42NO7P | 4.52E+02 | 4.51E+02 | 7.89E+00 | M+H |
| 123 | Phosphocholine | C5H15NO4P+ | 1.84E+02 | 1.84E+02 | 7.57E-01 | M+H |
